# Supplementary material for: Visible-Light-Sensitive Polymerizable and Polymeric Triazine-Based Photoinitiators with Enhanced Migration Stability
Source: MDPI journal article supplement (doi:10.3390/catal12111305), 2022-10-24
Supplement: s1 [file s1]

# Supporting Information

## Visible-Light-Sensitive Polymerizable and Polymeric Triazine-Based Photoinitiators with Enhanced Migration Stability

Liqiang Li <sup>†</sup>, Di Zhu <sup>†</sup>, Xiaotong Peng and Pu Xiao <sup>\*</sup>

Research School of Chemistry, Australian National University, Canberra, ACT 2601, Australia

<sup>\*</sup> Correspondence: pu.xiao@anu.edu.au

<sup>†</sup> These authors contributed equally to this work.

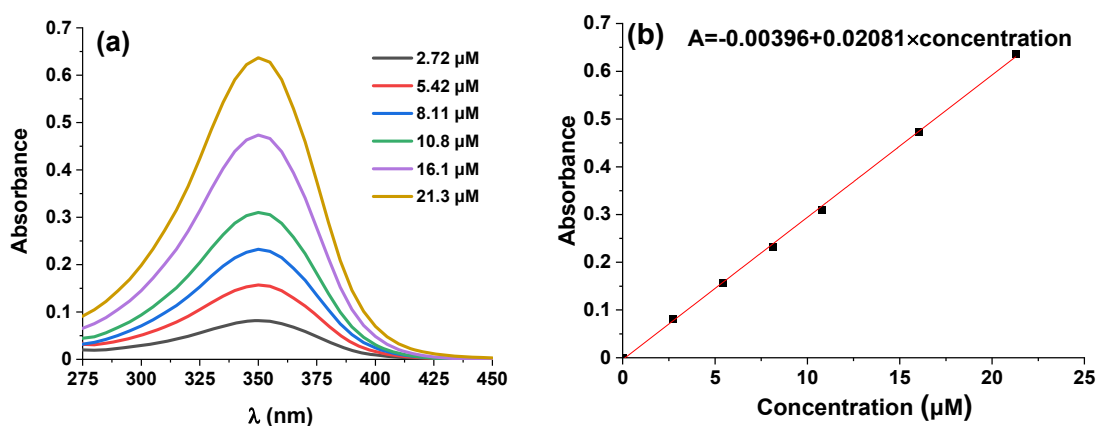

**Figure S1.** (a) UV-vis spectra of different concentrations of CT and (b) calibration curve of CT (absorbance at 350 nm vs concentration) in DMF.

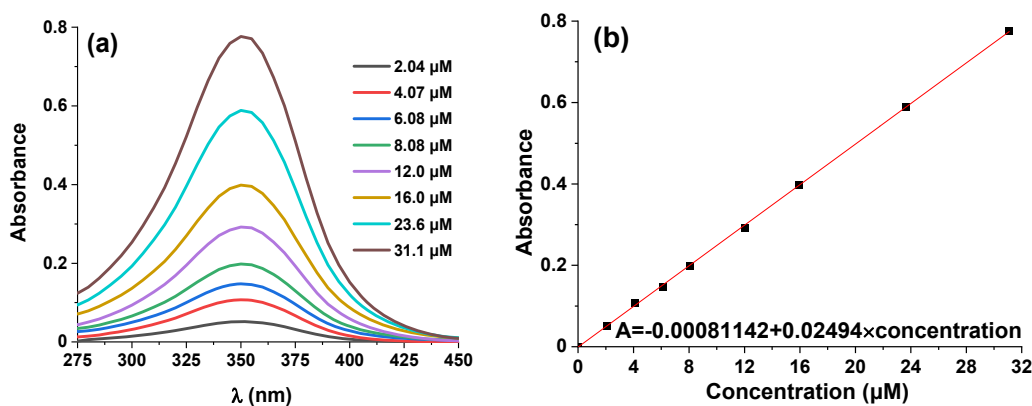

**Figure S2.** (—) UV-vis spectra of pCT with different concentrations of triazine moiety and (—) calibration curve of pCT (absorbance at 350 nm vs concentration of triazine moiety) in DMF.

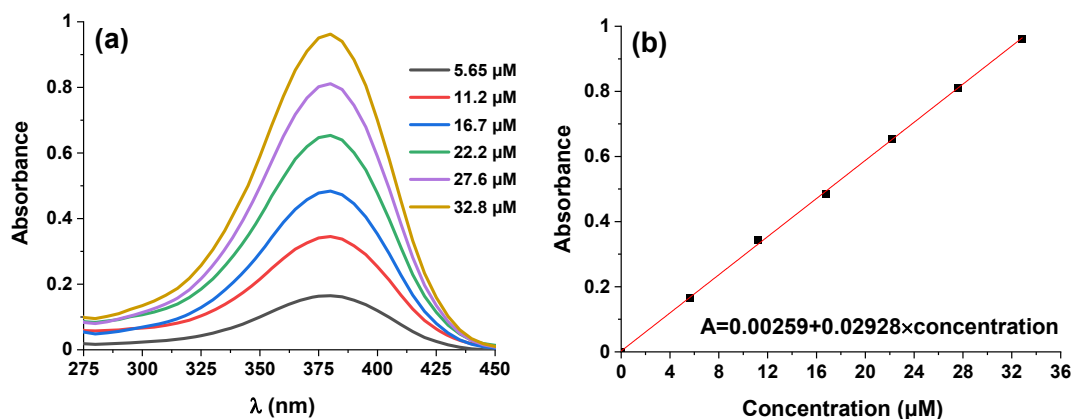

**Figure S3.** (–) UV-vis spectra of different concentrations of MT and (–) calibration curve of MT (absorbance at 380 nm vs concentration) in DMF.

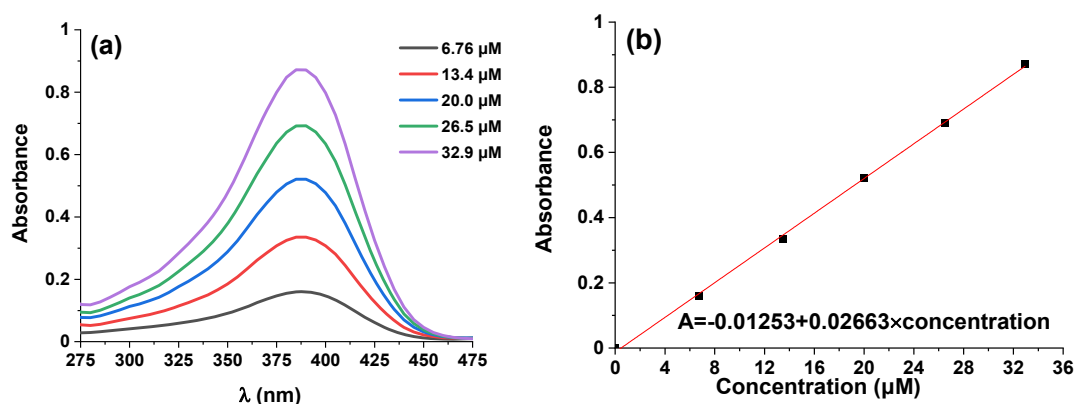

**Figure S4.** (–) UV-vis spectra of different concentrations of PT and (–) calibration curve of PT (absorbance at 385 nm vs concentration) in DMF.

#### Migration concentration:

The migration concentration ( $c$ ) was calculated based on the calibration curve of each photoinitiator as the function of absorbance ( $A$ ).

$$\text{CT: } c = (A + 0.00396) / 0.02081$$

$$\text{PT: } c = (A + 0.01253) / 0.02663$$

$$\text{MT: } c = (A - 0.00259) / 0.02928$$

$$\text{pCT: } c = (A + 0.00081142) / 0.02494$$

Samples prepared under the irradiation of LED@410 nm:

$$c_{\text{PT}} = 12.36 \mu\text{M}, c_{\text{CT}} = 1.61 \mu\text{M}, c_{\text{MT}} = 3.89 \mu\text{M}, c_{\text{pCT}} = 0.63 \mu\text{M}$$

Samples prepared under the irradiation of LED@400 nm:

$c_{PT} = 75.65 \mu\text{M}$ ,  $c_{CT} = 13.86 \mu\text{M}$ ,  $c_{MT} = 42.59 \mu\text{M}$ ,  $c_{pCT} = 2.99 \mu\text{M}$

**Migration ratio:**

The migration ratio (R) was calculated based on the formula

$R = \text{migration concentration} / \text{original concentration}$

Original concentration = triazine concentration  $\times$  weight of sample / volume =  $10 \mu\text{mol/g} \times 41.5 \text{ mg} / 4 \text{ mL} = 103.8 \mu\text{M}$

Samples prepared under the irradiation of LED@410 nm:

$R_{PT} = 11.91\%$ ,  $R_{CT} = 1.55\%$ ,  $R_{MT} = 3.75\%$ ,  $R_{pCT} = 0.61\%$

Samples prepared under the irradiation of LED@400 nm:

$R_{PT} = 72.88\%$ ,  $R_{CT} = 13.35\%$ ,  $R_{MT} = 41.03\%$ ,  $R_{pCT} = 2.88\%$

**Table S1.** Migration concentrations of photoinitiators from the photocured samples in DMF.

| <b>Photoinitiators</b> | <b>LED@400 nm</b> | <b>LED@410 nm</b> |
|------------------------|-------------------|-------------------|
| MT ( $\mu\text{M}$ )   | 42.59             | 3.89              |
| PT ( $\mu\text{M}$ )   | 75.65             | 12.36             |
| CT ( $\mu\text{M}$ )   | 13.86             | 1.61              |
| pCT ( $\mu\text{M}$ )  | 2.99              | 0.63              |
